# Supplementary material for: Doxorubicin-conjugated β-NaYF4:Gd3+/Tb3+ multifunctional, phosphor nanorods: a multi-modal, luminescent, magnetic probe for simultaneous optical and magnetic resonance imaging and an excellent pH-triggered anti-cancer drug delivery nanovehicle
Source: Royal Society of Chemistry journal article supplement (doi:10.1039/c5nr04473a), 2015-01-01
Supplement: c5nr04473a1.pdf [file c5nr04473a1.pdf]

## Supplementary Information

### Doxorubicin-conjugated $\beta$ -NaYF<sub>4</sub>: Gd<sup>3+</sup>/ Tb<sup>3+</sup> multifunctional, phosphor nanorods: A multimodal, luminescent-magnetic probe for simultaneous optical, magnetoresonance imaging and an excellent pH-triggered anti-cancer drug delivery nanovehicle

Preeti Padhye<sup>‡†</sup>, Aftab Alam<sup>§</sup>, Suvankar Ghorai<sup>§</sup>, Samit Chattopadhyay<sup>§</sup>, Pankaj Poddar<sup>‡†\*</sup>

<sup>‡</sup>Physical & Materials Chemistry Division, CSIR-National Chemical Laboratory, Pune - 411 008, India

<sup>†</sup>Academy of Scientific and Innovative Research, Anusandhan Bhawan, Rafi Marg, New Delhi - 110001, India

<sup>§</sup>National Center for Cell Sciences, Ganeshkhind, Pune-, 411 007, India

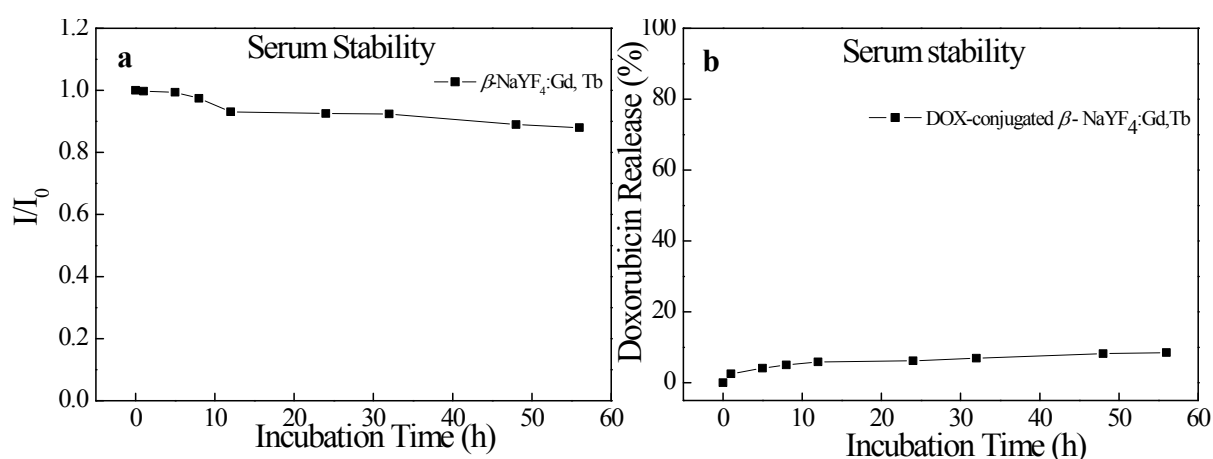

**Figure S1:** Stability of (a)  $\beta$ -NaYF<sub>4</sub>: Gd<sup>3+</sup>/ Tb<sup>3+</sup> and (b) DOX-conjugated  $\beta$ -NaYF<sub>4</sub>: Gd<sup>3+</sup>/ Tb<sup>3+</sup> in FBS for 3 days at 37 °C.

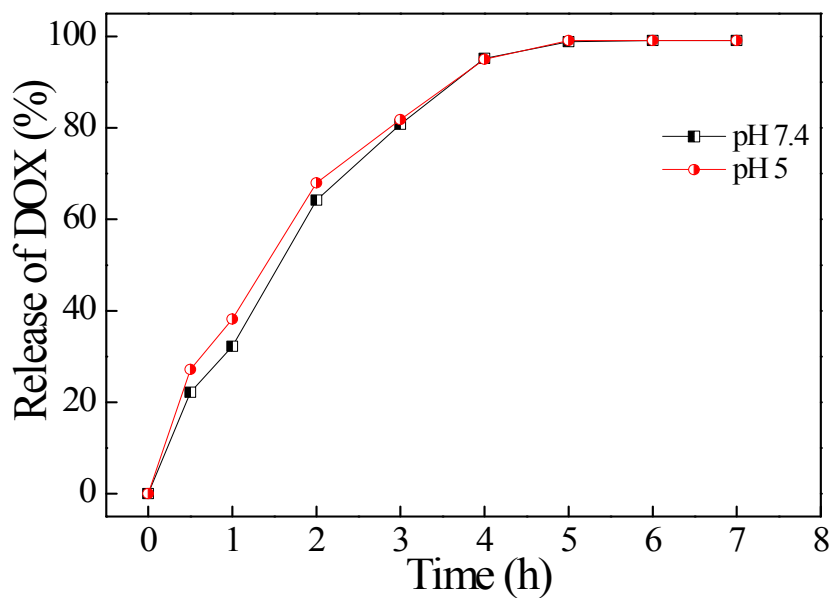

**Figure S2:** Release behavior of doxorubicin in the physically mixed solution of doxorubicin and  $\beta$ -NaYF<sub>4</sub>: Gd<sup>3+</sup>/ Tb<sup>3+</sup> nanorods at different time interval in PBS buffer at pH 7.4 and pH 5.

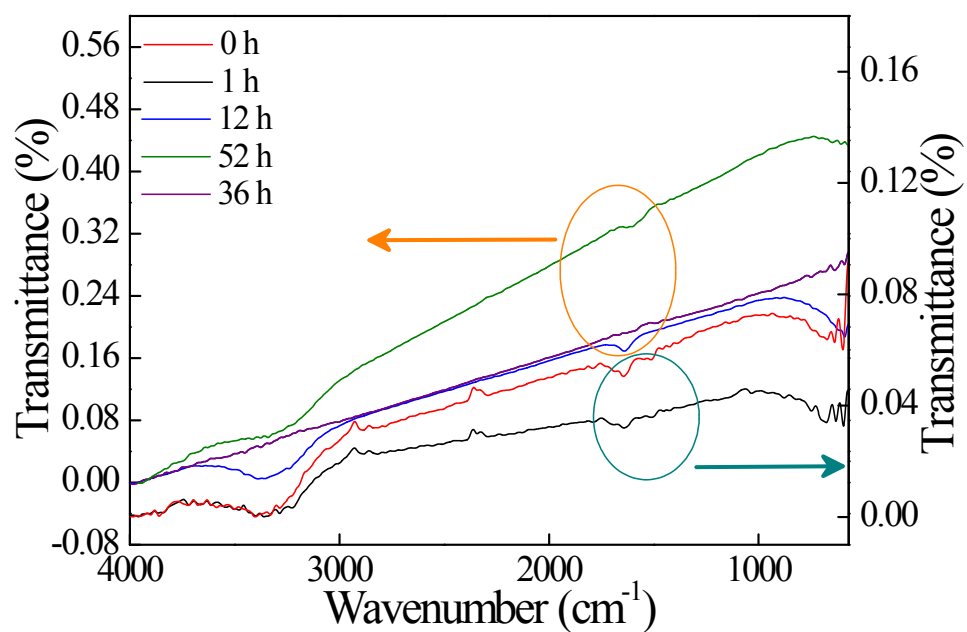

**Figure S3:** FT-IR spectra of DOX-conjugated  $\beta$ -NaYF<sub>4</sub>: Gd<sup>3+</sup>/ Tb<sup>3+</sup> at different time intervals during dialysis in PBS at pH 5, showing cleavage of hydrazone bond.

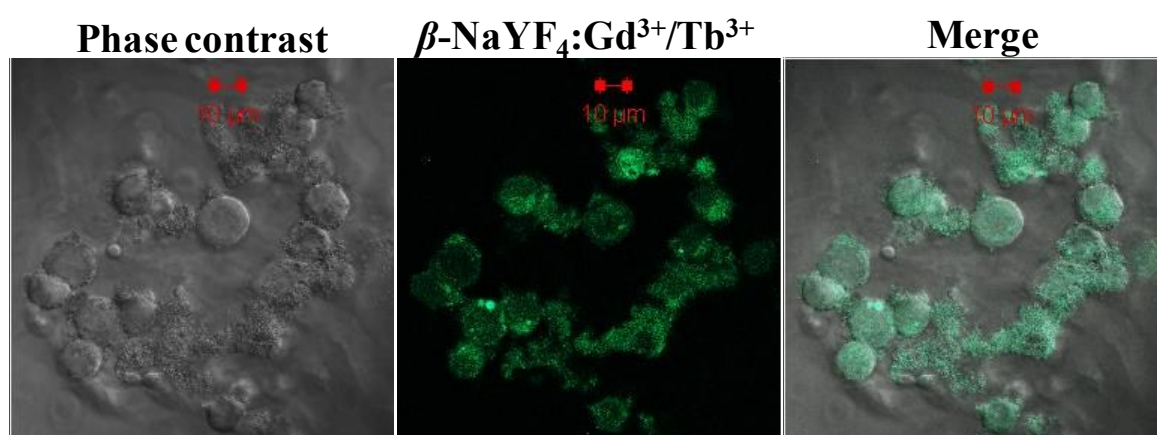

**Figure S4:** Confocal laser scanning microscopy (CLSM) images of MCF-7 cancer cells incubated with  $\beta$ -NaYF<sub>4</sub>: Gd<sup>3+</sup>/ Tb<sup>3+</sup> nanorods. The scale bar is 10  $\mu$ m.

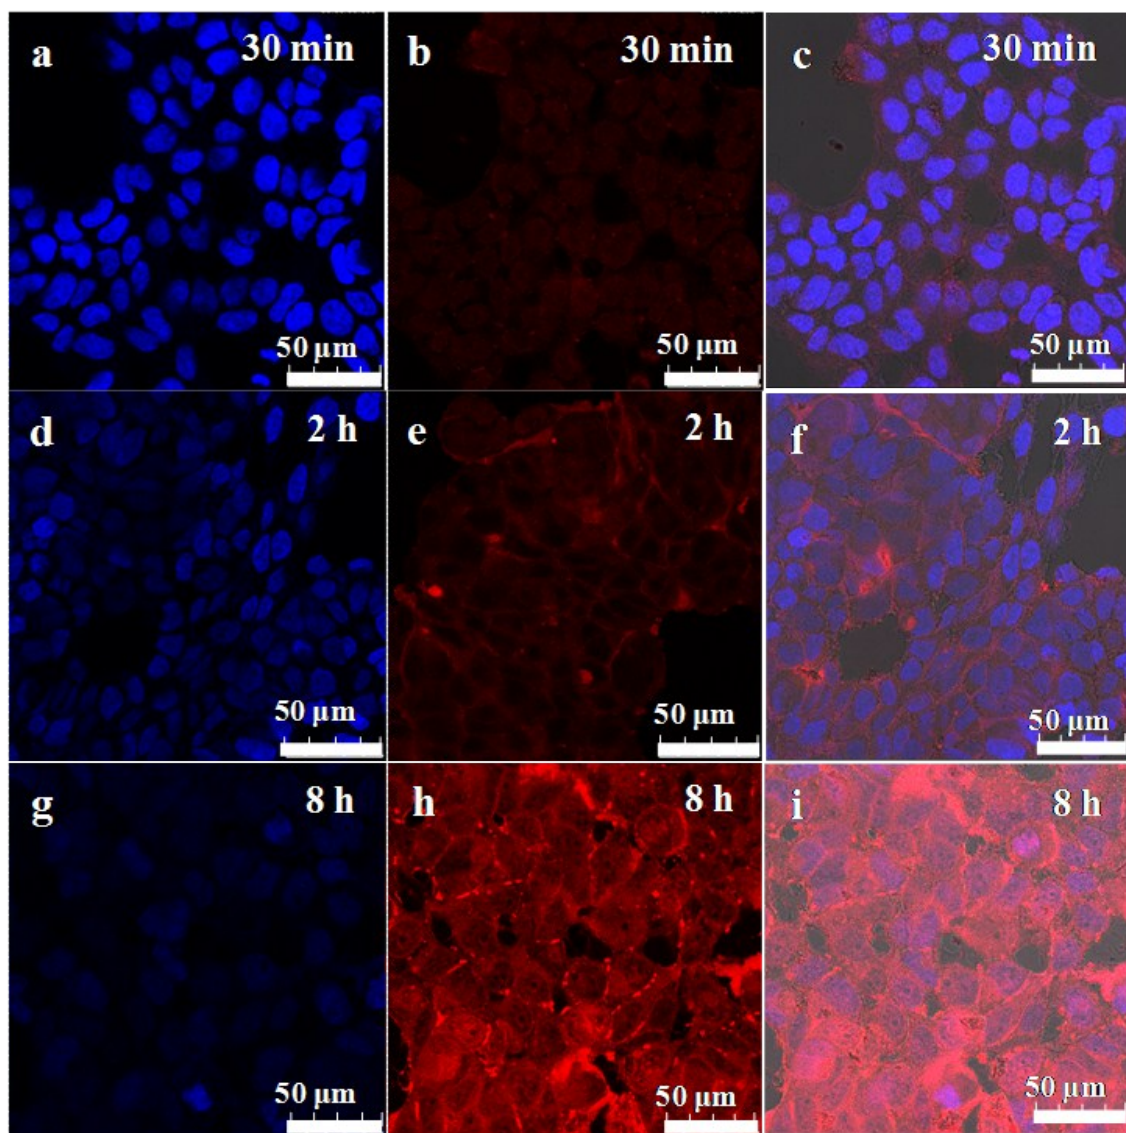

**Figure S5:** Confocal laser scanning microscopy (CLSM) images of MCF-7 cancer cells incubated with DOX-conjugated  $\beta$ -NaYF<sub>4</sub>:Gd<sup>3+</sup>/Tb<sup>3+</sup> nanorods for 30 min (a-c), 2 h (d-f), and 8 h (g-i) at 37 °C. The columns can be classified as (left) the nuclei of cells (being dyed in blue by DAPI for visualization), (middle) DOX-conjugated  $\beta$ -NaYF<sub>4</sub>:Gd<sup>3+</sup>/Tb<sup>3+</sup> nanorods and (right) a merge of the two channels of both. The red emission (591nm) is from DOX molecules.
